# Supplementary material
Source: publisher site journal article supplement (https://www.kjim.org/upload/media/kjim-2024-432-Supplementary-Fig-1.pdf)
Supplement: Supplementary file 1 [file kjim-2024-432-Supplementary-Fig-1.pdf]

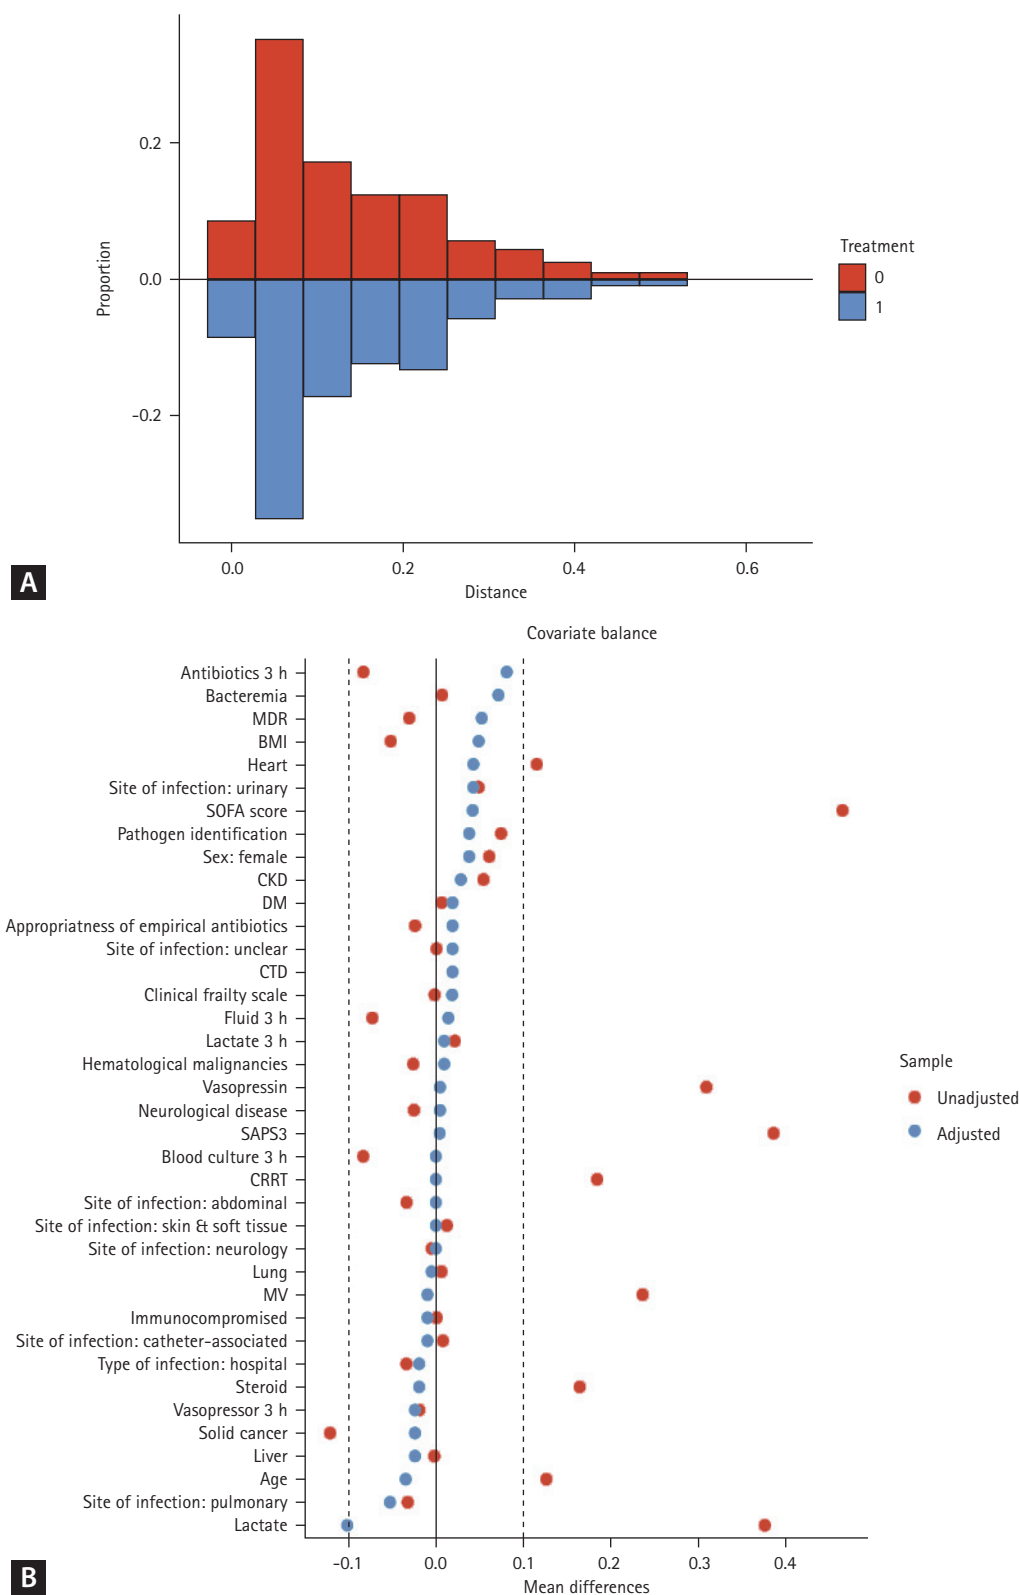

**Supplementary Figure 1.** Balances between the two matched cohorts; distribution of propensity scores (A) and standard mean differences (B). MDR, multidrug resistance; BMI, body mass index; SOFA, Sequential Organ Failure Assessment; CKD, chronic kidney disease; DM, diabetes mellitus; CTD, connective tissue disease; SAPS3, Simplified Acute Physiology Score 3; CRRT, continuous renal replacement therapy; MV, mechanical ventilation.
